# Supplementary material for: Combined Targeted Omic and Functional Assays Identify Phospholipases A2 that Regulate Docking/Priming in Calcium-Triggered Exocytosis
Source: MDPI journal article supplement (doi:10.3390/cells8040303), 2019-04-02
Supplement: s1 [file s1]

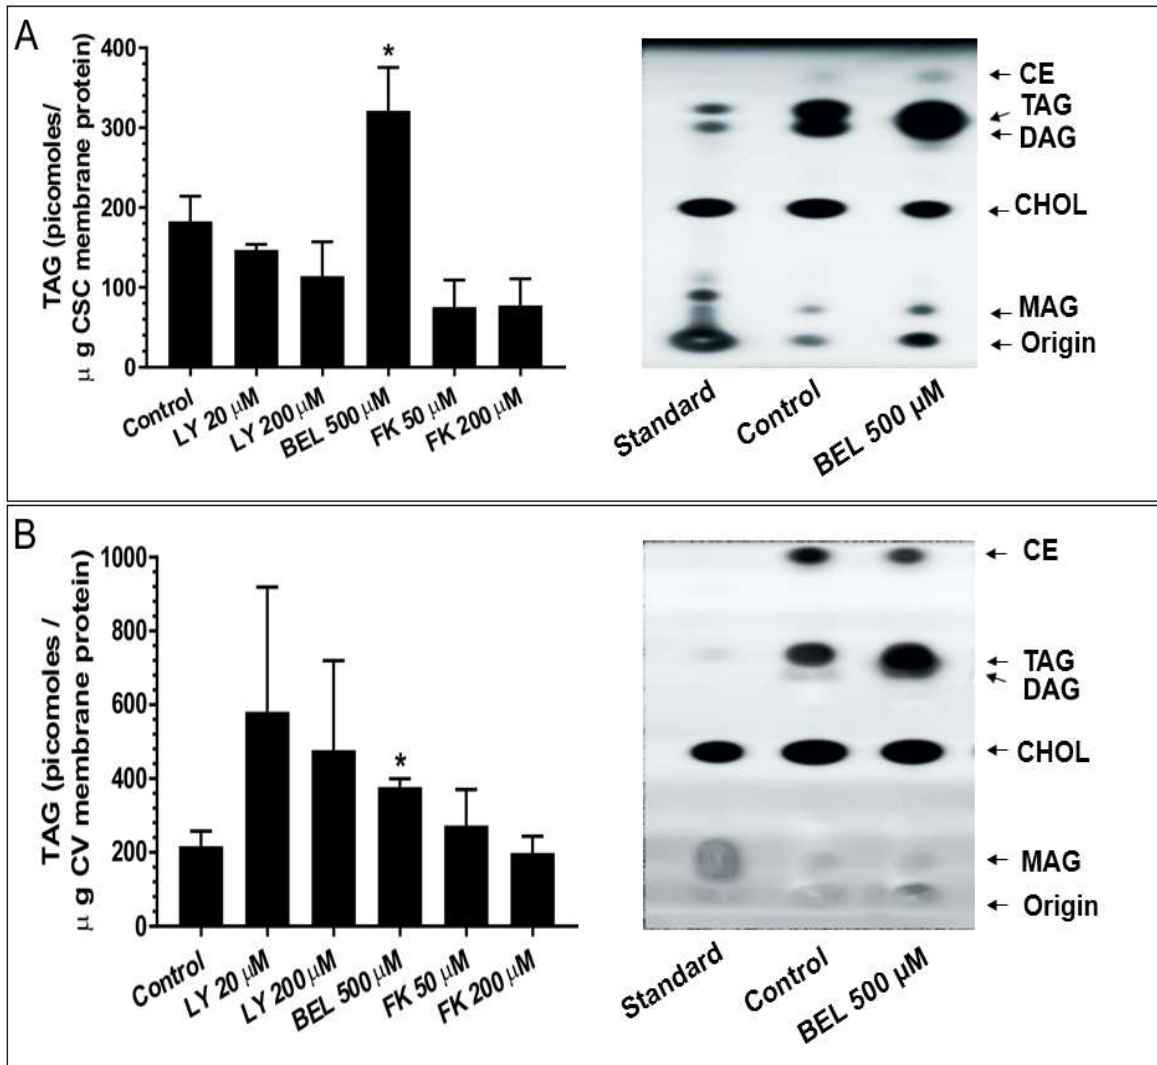

**Figure S1:** Endogenous TAG levels in (A) CSC,  $n = 3-9$  and; (B) CV,  $n = 2-8$  treated with the indicated doses of LY311727, BEL and FKKG-11 (representative chromatograms showing changes in neutral lipids). ( $p$ -value,  $* < 0.05$ , indicate difference relative to the control). A standard neutral lipid protocol was used to resolve the lipids [57].

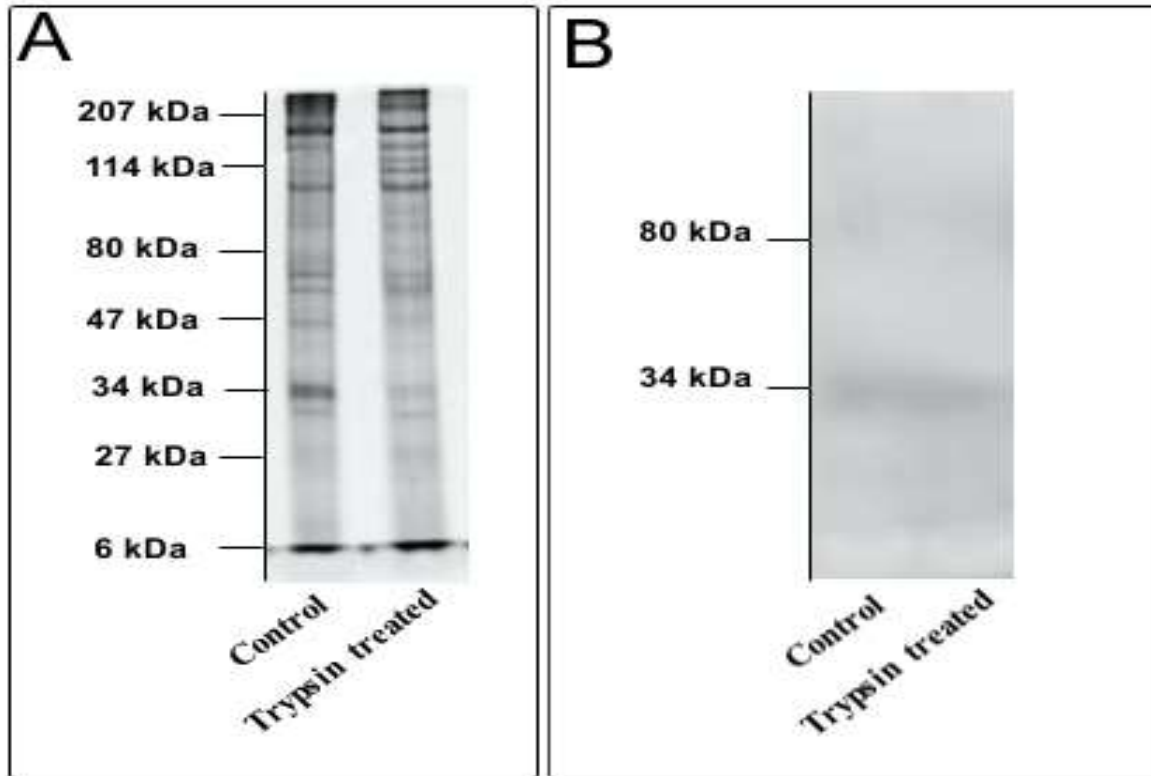

**Figure S2:** (A) SDS-PAGE of total membrane protein isolated from trypsin treated CV and a parallel untreated control stained with cCBB; (B) secondary antibody control western blot to identify non-specific protein binding (i.e. parallel control for western blot shown in Figure 6B). A total of 5 $\mu$ g CV membrane protein per lane was resolved.
